# Supplementary material
Source: Springer Nature journal article supplement (https://www.springermedizin.de/resource/supplementary/12891_2007_375_MOESM2_ESM.pdf/9511192)

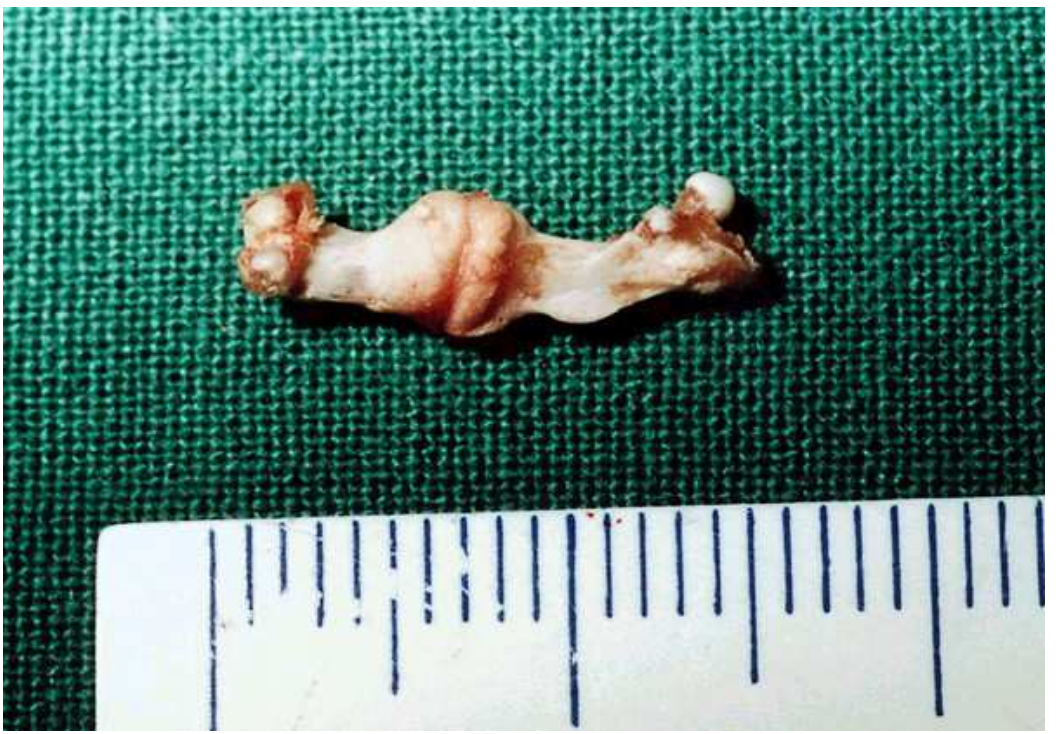

A

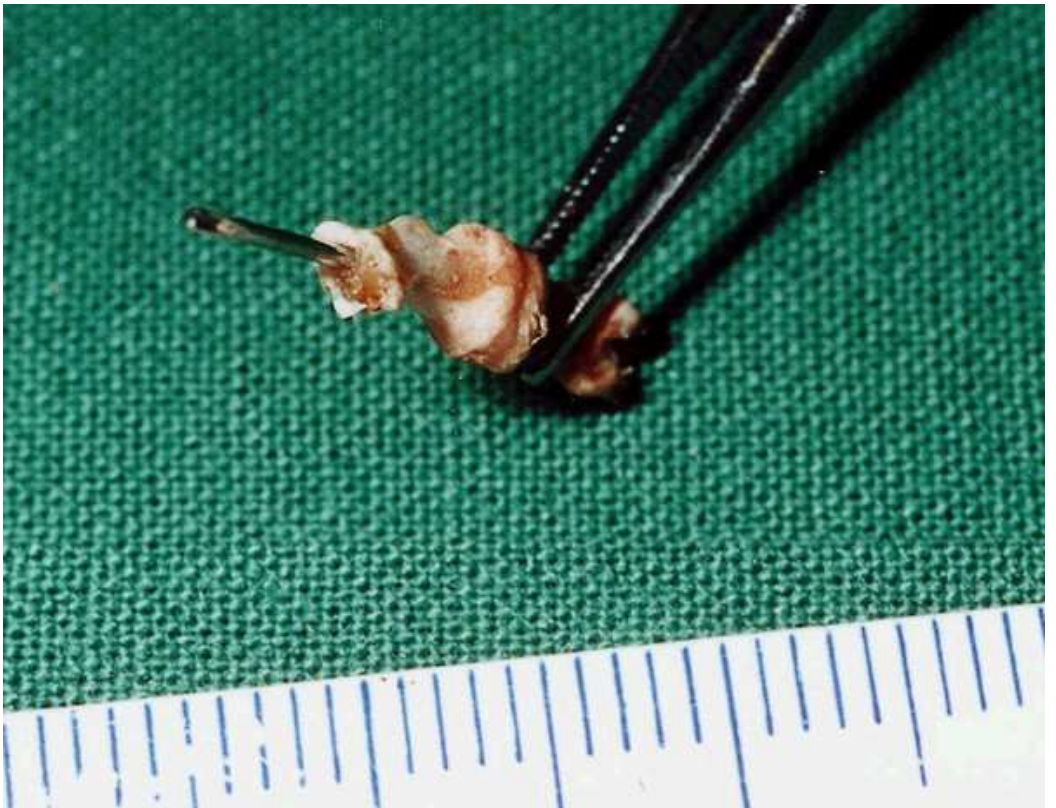

B

Supplement: MOESM2 [file 9511192]
